# Supplementary material for: Synthesis and piezoelectric response of cubic and spherical LiNbO3 nanocrystals
Source: Royal Society of Chemistry journal article supplement (doi:10.1039/c2ra00628f), 2012-01-01
Supplement: c2ra00628f.pdf [file c2ra00628f.pdf]

## Supplementary information

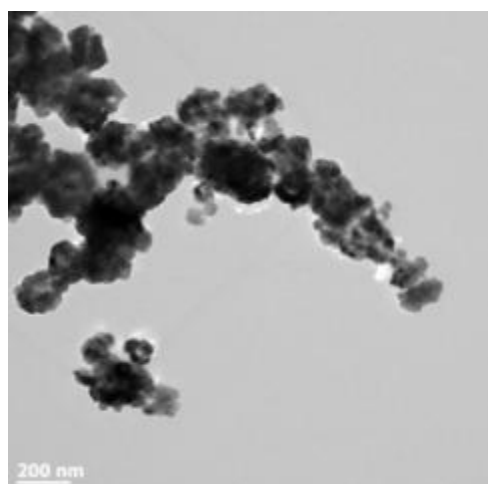

**Figure S1.** Bright field TEM image of LN particles taken after synthesis for 2 d at 235 °C.

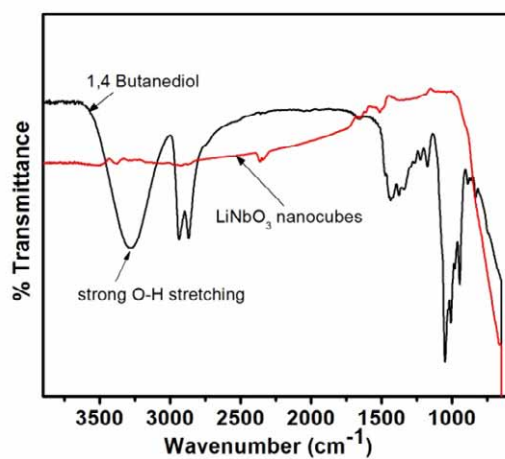

**Figure S3.** IR spectrum of LN nanocubes compared with 1,4-butanediol.

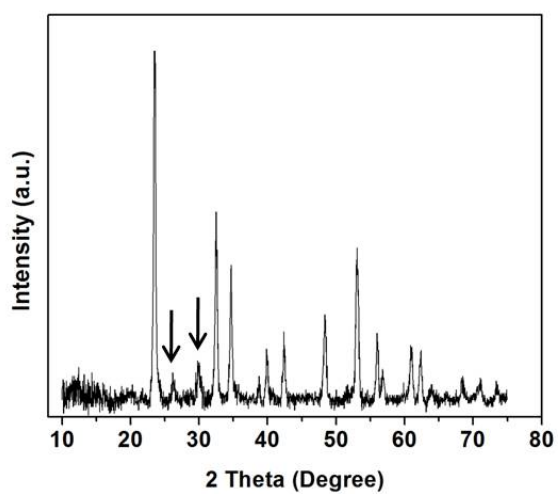

**Figure S2.** XRD pattern of LN nanoparticles after synthesis at 250 °C for 3 d shows formation of LiNbO<sub>3</sub> (highlighted by arrow mark).
